# Supplementary material for: Ppd-H1 integrates drought stress signals to control spike development and flowering time in barley
Source: PubMed Central journal article supplement (PMC7816852; doi:10.1093/jxb/eraa261), 2020-05-27
Supplement: eraa261_suppl_supplementary_table_s1_figures_s1-s5.pdf [file eraa261_suppl_supplementary_table_s1_figures_s1-s5.pdf]

**Supplemental Table 1: Oligonucleotides used in this study**

| Gene ID    | Gene name      | Forward primer sequence          | Reverse primer sequence            | Source                      |
|------------|----------------|----------------------------------|------------------------------------|-----------------------------|
| AJ249143   | <i>HvBM3</i>   | GCC GTC ACC AGC ACA<br>AGC AA    | CCC CAT TCA CCC TGT AGC<br>AAA GA  | Digel et al., 2015          |
| AJ249146   | <i>HvBM8</i>   | CCA CAG CAG CCG ACA<br>CCT A     | TGC CTT TGG GGG AGA AGA<br>CG      | Digel et al., 2015          |
| AK362208   | <i>HvGAPDH</i> | GTG AGG CTG GTG CTG<br>ATT ACG   | AGT GGT GCA GCT AGC ATT<br>TGA GAC | Ejaz and von<br>Korff, 2016 |
| AK376549   | <i>HvPRR73</i> | GCG CCG TAG AGA ATC<br>AGA AC    | CAT GTC GGG TAC AGT CAT<br>CG      | Campoli et al.,<br>2012b    |
| AY145451   | <i>HvACTIN</i> | CGT GTT GGA TTC TGG<br>TGA TG    | AGC CAC ATA TGC GAG CTT<br>CT      | Campoli et al.,<br>2012a    |
| AY740524   | <i>HvGI</i>    | TCA GTT AGA GCT CCT<br>GGA AGT   | GGT AGT TTG GGC TTT GGA<br>TG      | Campoli et al.,<br>2012b    |
| AY750995   | <i>HvVRN1</i>  | CTG AAG GCG AAG GTT<br>GAG AC    | TTC TCC TCC TGC AGT GAC<br>CT      | Campoli et al.,<br>2012a    |
| AY970701   | <i>Ppd-H1</i>  | GAT GGA TTC AAA GGC<br>AAG GA    | GAA CAA TTG GCT CCT CCA<br>AA      | Campoli et al.,<br>2012a    |
| DQ100327   | <i>HvFT1</i>   | GGT AGA CCC AGA TGC<br>TCC AA    | TCG TAG CAC ATC ACC TCC<br>TG      | Campoli et al.,<br>2012a    |
| AY150676   | <i>HvABI5</i>  | CGC GCT GAA GTA TTG<br>AAA CA    | CAC CAG AAC GTT GCA GCT<br>TA      | Kobayashi et al.,<br>2008   |
| AJ508228.2 | <i>HvADP</i>   | GCT CTC CAA CAA CAT<br>TGC CAA C | GAG ACA TCC AGC ATC ATT<br>CAT TCC | Ferdous et al.,<br>2015     |
| JN603243   | <i>HvPRR1</i>  | GAG CAT AGC ATG GCA<br>CTT CA    | TGT CTT TCC TCG GAA ATT<br>GG      | Campoli et<br>al.2012b      |
| AK361360   | <i>HvPRR59</i> | GAA ATT CCG CAT GAA<br>AAG GA    | TTC CGC ATC TTC TGT TGT<br>TG      | Campoli et<br>al.2012b      |
| JN603242   | <i>HvCCA1</i>  | CCT GGA ATT GGA GAT<br>GGA GA    | TGA GCA TGG CTT CTG ATT<br>TG      | Campoli et<br>al.2012b      |
| AK252005   | <i>HvPRR95</i> | CAG AAC TCC AGT GTC<br>GCA AA    | TGC TGT TGC CAG AGT TGT<br>TC      | Campoli et<br>al.2012b      |
| Hv.20312   | <i>HvLUX1</i>  | AAT TCA GTC CAC GGA<br>TGC TC    | CTT CAC TTC AGC TCC CCT<br>TG      | Campoli et<br>al.2012b      |

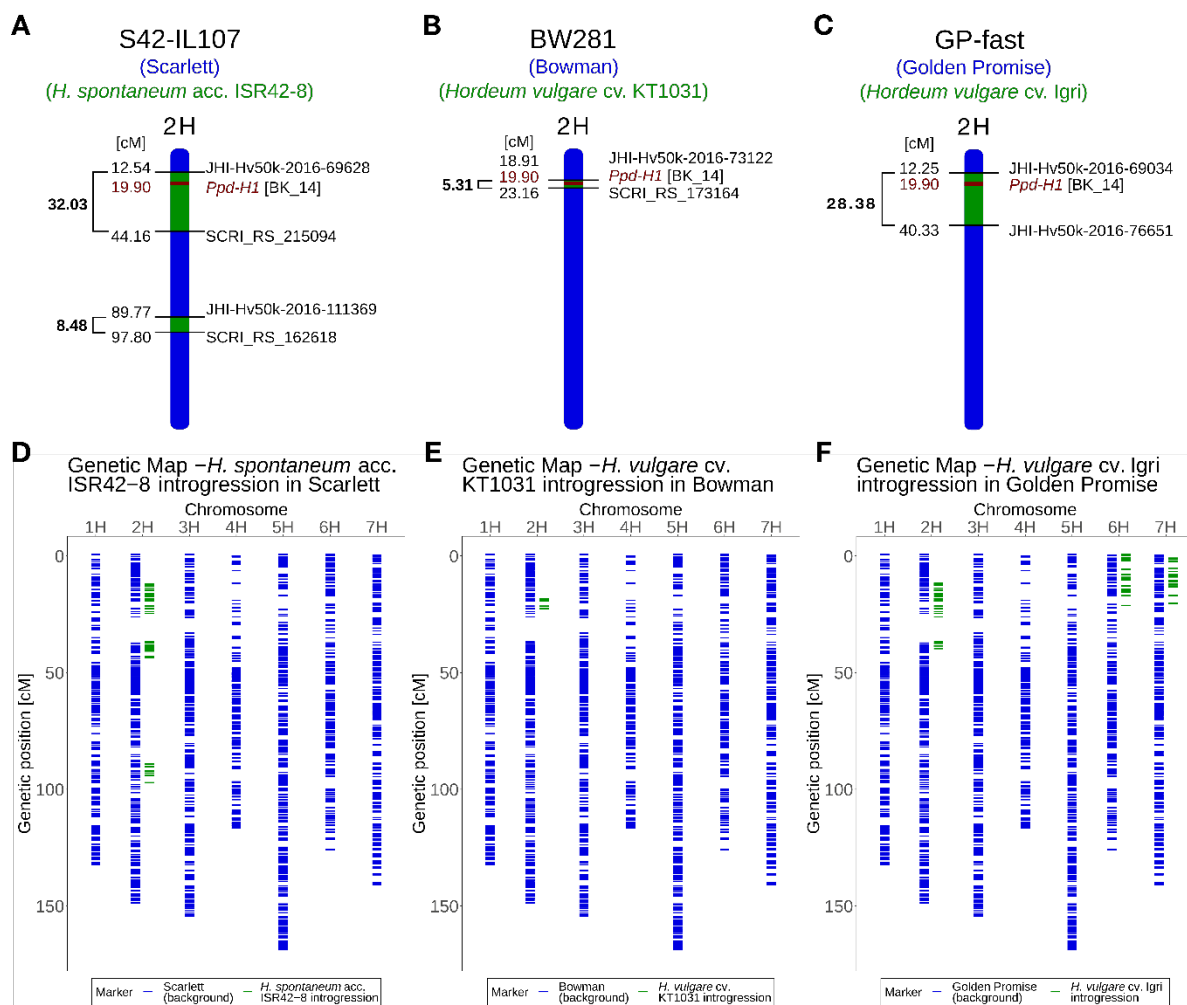

**Supplemental Figure 1 Genetic map of *Ppd-H1* introgression in spring barley backgrounds, introgression size in centimorgan (cM) and the polymorphic markers flanking the insertions.** Donor parents of wild-type *Ppd-H1* allele (green) introgressed into their respective background cultivars (blue). Introgression lines were genotyped with the Barley 50k iSelect SNP Array (Bayer *et al.*, 2017). Location of introgressed *Ppd-H1* allele and flanking regions on chromosome 2H (A-C), and overview of all chromosomes of the three introgression lines (D-F). Mapping positions of markers were obtained from the POPSEQ\_2017 map (Cantalapiedra *et al.*, 2015; Mascher *et al.*, 2017), and the sizes of introgressed regions were calculated from the midway point between flanking SNPs. There are additional donor introgressions in GP-fast on chromosome 6H and 7H, 22.34 cM and 19.90 cM, respectively.

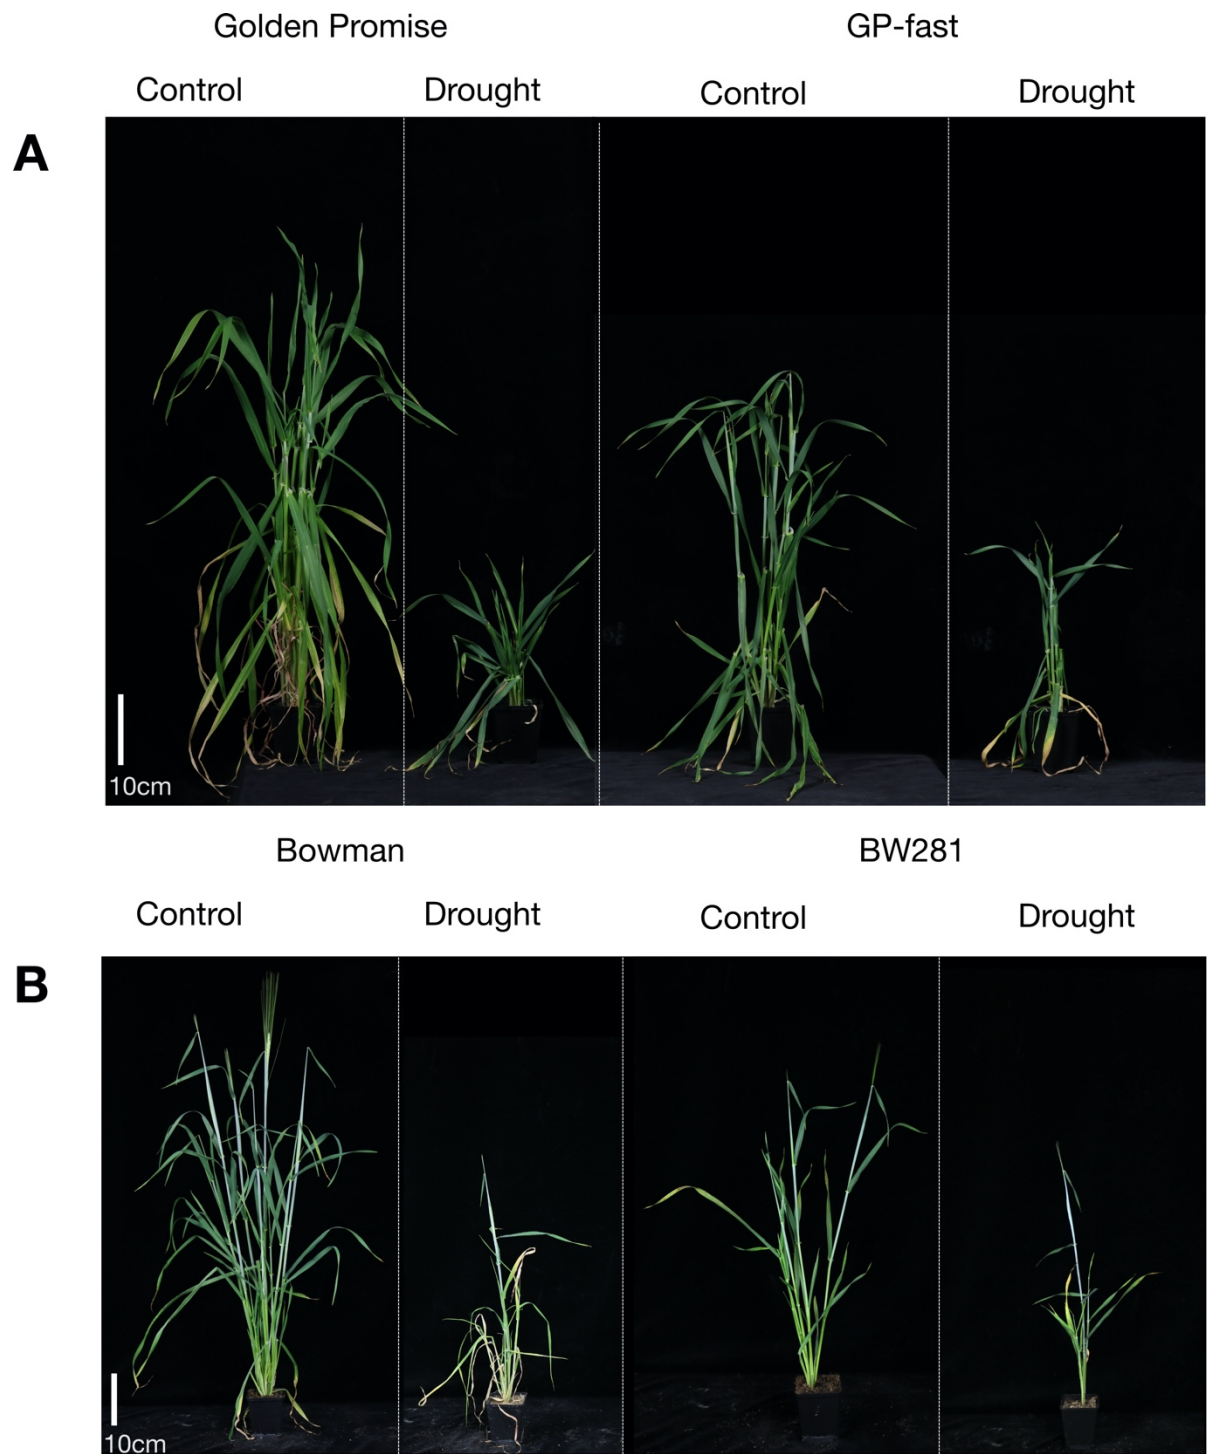

**Supplemental Figure 2 Flowering morphology in Golden Promise and Bowman background under continuous drought.** Representative plants of Golden Promise and GP-fast (A) plants at heading under control conditions after 63 and 43 DAE respectively. Representative plants of Bowman and BW281 (B) at heading under control conditions after 43 and 35 DAE respectively. Plants were grown under LDs (16 h light/8 h night) under either drought or control conditions.

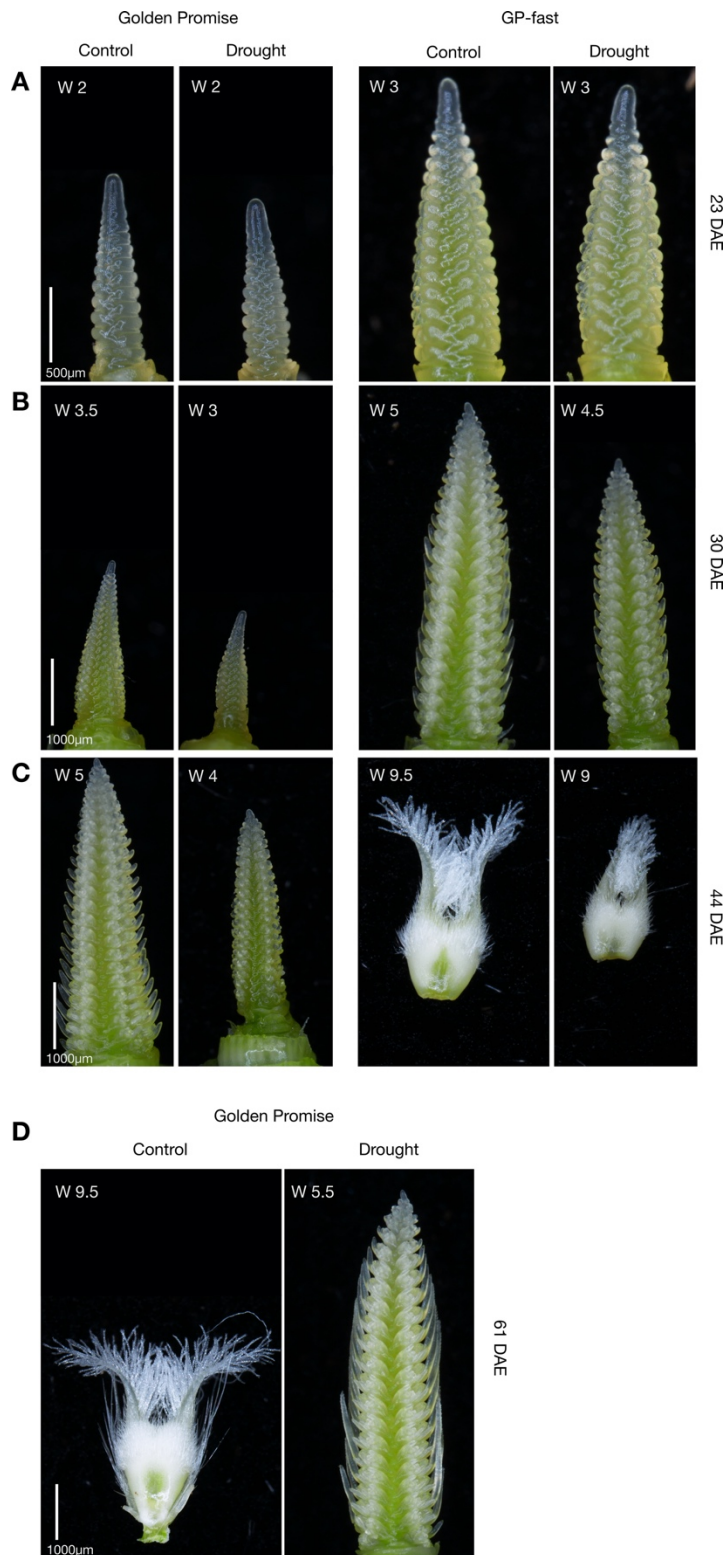

**Supplemental Figure 3 MSA and pistil morphology in Golden Promise background.** Representative images of MSAs or pistils of Golden Promise and GP-fast 23 DAE (A), 30 DAE (B), 44 DAE (C) and 62 DAE (D). No images of GP-fast are presented for 62 DAE because plants had already flowered. Plants were grown under LDs (16 h light/8 h night) under either drought or control conditions.

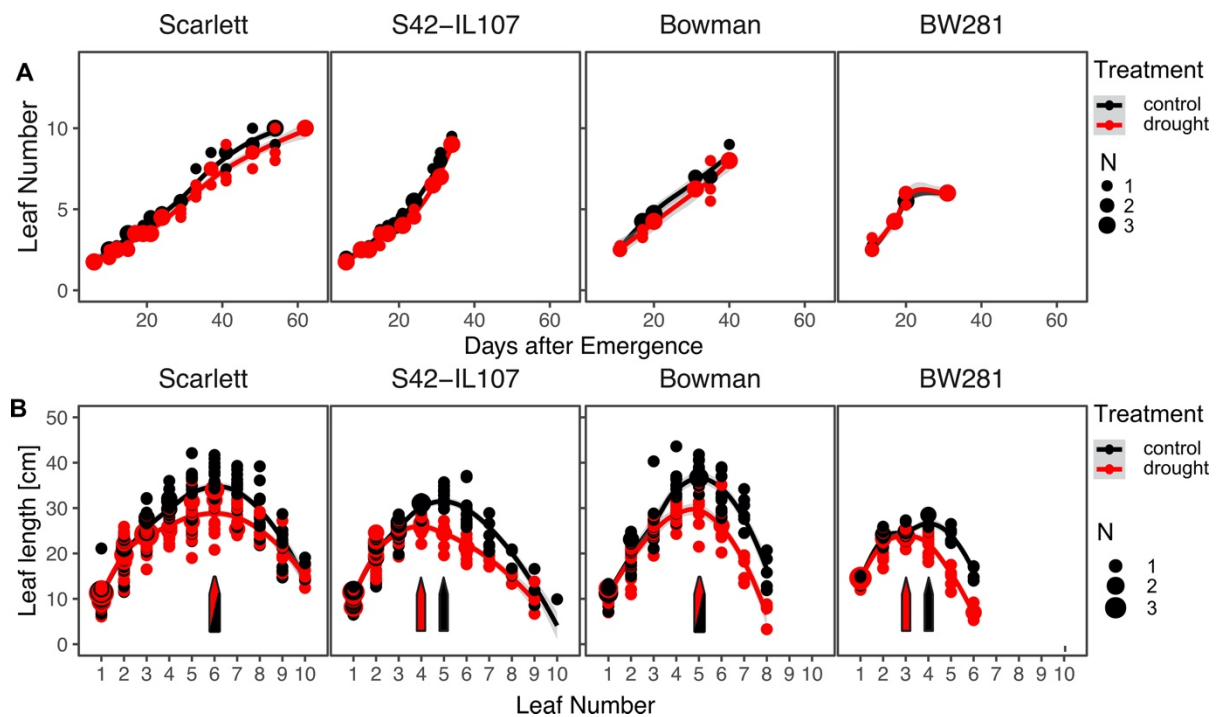

**Supplemental Figure 4 Continuous drought affects leaf size but not the phyllochron in barley.** Leaf emergence (A) and length of fully emerged leaves (B) were scored over development under control (black) and drought (red) conditions in LDs (16 h light/8 h night) in the spring barley cultivars Scarlett and Bowman and their derived introgression lines S42-IL107 and BW281. Dot sizes indicate the number of overlapping samples. Trend lines were calculated using a polynomial regression (Loess smooth line), grey areas show 95% confidence interval.

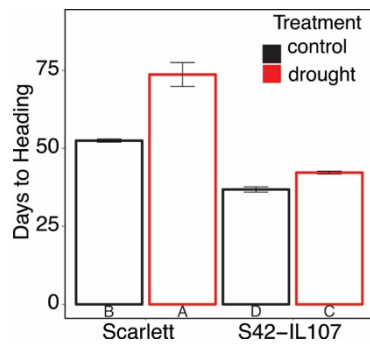

**Supplemental Figure 5 Severe drought delays flowering in barley.** Days to heading was scored under control (black) and drought (red) conditions in LDs (16 h light/8 h night) in the spring barley cultivar Scarlett and the derived introgression line S42-IL107. Statistical groups were assigned using Kruskal-Wallis ANOVA and post-hoc Conover-Iman-test and Bonferroni correction. Different letters indicate groups differ ( $p < 0.05$ ).
